# Supplementary material
Source: publisher figshare collection journal article supplement (https://acs.figshare.com/ndownloader/files/4707526)
Supplement: Supplementary file 1 [file 4707526]

  

data_wong109a 

  

_audit_creation_method            SHELXL-97 

_chemical_name_systematic 

; 

 ? 

; 

_chemical_name_common             ? 

_chemical_melting_point           ? 

_chemical_formula_moiety          ? 

_chemical_formula_sum 

 'C23 H36 Cl Cu N5 O8' 

_chemical_formula_weight          609.56 

  

loop_ 

 _atom_type_symbol 

 _atom_type_description 

 _atom_type_scat_dispersion_real 

 _atom_type_scat_dispersion_imag 

 _atom_type_scat_source 

 'C'  'C'   0.0033   0.0016 

 'International Tables Vol C Tables 4.2.6.8 and 6.1.1.4' 

 'H'  'H'   0.0000   0.0000 

 'International Tables Vol C Tables 4.2.6.8 and 6.1.1.4' 

 'N'  'N'   0.0061   0.0033 

 'International Tables Vol C Tables 4.2.6.8 and 6.1.1.4' 

 'O'  'O'   0.0106   0.0060 

 'International Tables Vol C Tables 4.2.6.8 and 6.1.1.4' 

 'Cl'  'Cl'   0.1484   0.1585 

 'International Tables Vol C Tables 4.2.6.8 and 6.1.1.4' 

 'Cu'  'Cu'   0.3201   1.2651 

 'International Tables Vol C Tables 4.2.6.8 and 6.1.1.4' 

  

_symmetry_cell_setting            Orthorhombic 

_symmetry_space_group_name_H-M    Pbca 

  

loop_ 

 _symmetry_equiv_pos_as_xyz 

 'x, y, z' 

 '-x+1/2, -y, z+1/2' 

 '-x, y+1/2, -z+1/2' 

 'x+1/2, -y+1/2, -z' 

 '-x, -y, -z' 

 'x-1/2, y, -z-1/2' 

 'x, -y-1/2, z-1/2' 

 '-x-1/2, y-1/2, z' 

  

_cell_length_a                    21.134(4) 

_cell_length_b                    10.7258(16) 

_cell_length_c                    23.111(4) 

_cell_angle_alpha                 90.00 

_cell_angle_beta                  90.00 

_cell_angle_gamma                 90.00 

_cell_volume                      5238.6(15) 

_cell_formula_units_Z             8 

_cell_measurement_temperature     100(2) 

_cell_measurement_reflns_used     7642 

_cell_measurement_theta_min       2.30 

_cell_measurement_theta_max       27.68 

  

_exptl_crystal_description        plate 

_exptl_crystal_colour             blue 

_exptl_crystal_size_max           0.40 

_exptl_crystal_size_mid           0.30 

_exptl_crystal_size_min           0.08 

_exptl_crystal_density_meas       0 

_exptl_crystal_density_diffrn     1.546 

_exptl_crystal_density_method     'not measured' 

_exptl_crystal_F_000              2552 

_exptl_absorpt_coefficient_mu     0.993 

_exptl_absorpt_correction_type    none 

_exptl_absorpt_correction_T_min   ? 

_exptl_absorpt_correction_T_max   ? 

_exptl_absorpt_process_details    ? 

  

_exptl_special_details 

; 

 ? 

; 

  

_diffrn_ambient_temperature       100(2) 

_diffrn_radiation_wavelength      0.71073 

_diffrn_radiation_type            MoK\a 

_diffrn_radiation_source          'fine-focus sealed tube' 

_diffrn_radiation_monochromator   graphite 

_diffrn_measurement_device_type   'CCD area detector' 

_diffrn_measurement_method        'phi and omega scans' 

_diffrn_detector_area_resol_mean  ? 

_diffrn_standards_number          ? 

_diffrn_standards_interval_count  ? 

_diffrn_standards_interval_time   ? 

_diffrn_standards_decay_%         ? 

_diffrn_reflns_number             22661 

_diffrn_reflns_av_R_equivalents   0.0533 

_diffrn_reflns_av_sigmaI/netI     0.0432 

_diffrn_reflns_limit_h_min        -25 

_diffrn_reflns_limit_h_max        23 

_diffrn_reflns_limit_k_min        -12 

_diffrn_reflns_limit_k_max        12 

_diffrn_reflns_limit_l_min        -27 

_diffrn_reflns_limit_l_max        27 

_diffrn_reflns_theta_min          1.93 

_diffrn_reflns_theta_max          25.00 

_reflns_number_total              4613 

_reflns_number_gt                 3623 

_reflns_threshold_expression      >2sigma(I) 

  

_computing_data_collection        'Bruker SMART' 

_computing_cell_refinement        'Bruker SMART' 

_computing_data_reduction         'Bruker SAINT' 

_computing_structure_solution     'SHELXS-97 (Sheldrick, 1990)' 

_computing_structure_refinement   'SHELXL-97 (Sheldrick, 1997)' 

_computing_molecular_graphics     'Bruker SHELXTL' 

_computing_publication_material   'Bruker SHELXTL' 

  

_refine_special_details 

; 

 Refinement of F^2^ against ALL reflections.  The weighted R-factor wR and 

 goodness of fit S are based on F^2^, conventional R-factors R are based 

 on F, with F set to zero for negative F^2^. The threshold expression of 

 F^2^ > 2sigma(F^2^) is used only for calculating R-factors(gt) etc. and is 

 not relevant to the choice of reflections for refinement.  R-factors based 

 on F^2^ are statistically about twice as large as those based on F, and R- 

 factors based on ALL data will be even larger. 

; 

  

_refine_ls_structure_factor_coef  Fsqd 

_refine_ls_matrix_type            full 

_refine_ls_weighting_scheme       calc 

_refine_ls_weighting_details 

 'calc w=1/[\s^2^(Fo^2^)+(0.0650P)^2^+8.0000P] where P=(Fo^2^+2Fc^2^)/3' 

_atom_sites_solution_primary      direct 

_atom_sites_solution_secondary    difmap 

_atom_sites_solution_hydrogens    geom 

_refine_ls_hydrogen_treatment     mixed 

_refine_ls_extinction_method      none 

_refine_ls_extinction_coef        ? 

_refine_ls_number_reflns          4613 

_refine_ls_number_parameters      343 

_refine_ls_number_restraints      0 

_refine_ls_R_factor_all           0.0712 

_refine_ls_R_factor_gt            0.0542 

_refine_ls_wR_factor_ref          0.1398 

_refine_ls_wR_factor_gt           0.1303 

_refine_ls_goodness_of_fit_ref    1.049 

_refine_ls_restrained_S_all       1.049 

_refine_ls_shift/su_max           0.059 

_refine_ls_shift/su_mean          0.002 

  

loop_ 

 _atom_site_label 

 _atom_site_type_symbol 

 _atom_site_fract_x 

 _atom_site_fract_y 

 _atom_site_fract_z 

 _atom_site_U_iso_or_equiv 

 _atom_site_adp_type 

 _atom_site_occupancy 

 _atom_site_symmetry_multiplicity 

 _atom_site_calc_flag 

 _atom_site_refinement_flags 

 _atom_site_disorder_assembly 

 _atom_site_disorder_group 

Cu1 Cu 0.06938(2) 0.71787(4) 0.11188(2) 0.02887(17) Uani 1 1 d . . . 

Cl1 Cl 0.15863(5) 0.20098(11) 0.22701(5) 0.0452(3) Uani 1 1 d . . . 

O1 O -0.03531(14) 0.8209(3) -0.02021(12) 0.0422(7) Uani 1 1 d . . . 

O2 O -0.00317(13) 0.5561(3) 0.13312(12) 0.0381(7) Uani 1 1 d . . . 

O3 O 0.03464(13) 0.7226(3) 0.03373(12) 0.0365(7) Uani 1 1 d . . . 

O4 O 0.2115(2) 0.1263(5) 0.2214(3) 0.122(2) Uani 1 1 d . . . 

O5 O 0.1362(3) 0.2332(5) 0.1722(2) 0.143(3) Uani 1 1 d . . . 

O6 O 0.11206(17) 0.1291(4) 0.25452(18) 0.0739(11) Uani 1 1 d . . . 

O7 O 0.1730(2) 0.3108(4) 0.25744(18) 0.0748(12) Uani 1 1 d . . . 

O8 O -0.1606(4) 0.7704(13) 0.0171(6) 0.269(6) Uani 1 1 d . . . 

N1 N 0.14955(16) 0.8460(3) 0.09804(16) 0.0404(9) Uani 1 1 d . . . 

N2 N 0.12076(15) 0.5618(3) 0.09145(14) 0.0339(8) Uani 1 1 d . . . 

N3 N 0.01827(15) 0.8760(3) 0.12694(14) 0.0332(8) Uani 1 1 d . . . 

N4 N 0.10100(15) 0.7027(3) 0.19374(14) 0.0323(8) Uani 1 1 d . . . 

N5 N -0.01935(15) 0.3607(3) 0.09802(14) 0.0343(8) Uani 1 1 d . . . 

H5B H 0.0002 0.2997 0.0799 0.041 Uiso 1 1 calc R . . 

C1 C -0.0220(2) 0.8919(4) 0.07519(18) 0.0430(11) Uani 1 1 d . . . 

H1A H -0.0182 0.9791 0.0616 0.052 Uiso 1 1 calc R . . 

H1B H -0.0667 0.8782 0.0865 0.052 Uiso 1 1 calc R . . 

C2 C -0.00632(19) 0.8053(4) 0.02534(17) 0.0335(9) Uani 1 1 d . . . 

C3 C -0.02149(19) 0.8636(4) 0.17940(17) 0.0380(10) Uani 1 1 d . . . 

H3A H -0.0519 0.7947 0.1731 0.046 Uiso 1 1 calc R . . 

H3B H -0.0464 0.9412 0.1840 0.046 Uiso 1 1 calc R . . 

C4 C 0.0135(2) 0.8391(4) 0.23522(18) 0.0387(10) Uani 1 1 d . . . 

H4B H -0.0175 0.8396 0.2674 0.046 Uiso 1 1 calc R . . 

H4C H 0.0435 0.9083 0.2420 0.046 Uiso 1 1 calc R . . 

C5 C 0.0497(2) 0.7174(4) 0.23712(17) 0.0379(10) Uani 1 1 d . . . 

H5C H 0.0684 0.7084 0.2762 0.045 Uiso 1 1 calc R . . 

H5D H 0.0192 0.6483 0.2319 0.045 Uiso 1 1 calc R . . 

C6 C 0.1241(2) 0.5712(4) 0.19791(18) 0.0384(10) Uani 1 1 d . . . 

H6B H 0.0877 0.5146 0.2039 0.046 Uiso 1 1 calc R . . 

H6C H 0.1528 0.5630 0.2316 0.046 Uiso 1 1 calc R . . 

C7 C 0.1585(2) 0.5348(4) 0.14391(19) 0.0412(10) Uani 1 1 d . . . 

H7B H 0.1990 0.5809 0.1419 0.049 Uiso 1 1 calc R . . 

H7C H 0.1683 0.4446 0.1453 0.049 Uiso 1 1 calc R . . 

C8 C 0.1873(2) 0.8170(5) 0.0463(2) 0.0533(13) Uani 1 1 d . . . 

H8A H 0.2243 0.8736 0.0452 0.064 Uiso 1 1 calc R . . 

H8B H 0.1613 0.8345 0.0116 0.064 Uiso 1 1 calc R . . 

C9 C 0.2109(2) 0.6824(5) 0.0430(2) 0.0567(14) Uani 1 1 d . . . 

H9A H 0.2387 0.6751 0.0087 0.068 Uiso 1 1 calc R . . 

H9B H 0.2373 0.6662 0.0775 0.068 Uiso 1 1 calc R . . 

C10 C 0.1616(2) 0.5816(5) 0.0393(2) 0.0464(11) Uani 1 1 d . . . 

H10A H 0.1336 0.6006 0.0061 0.056 Uiso 1 1 calc R . . 

H10B H 0.1833 0.5020 0.0306 0.056 Uiso 1 1 calc R . . 

C11 C 0.1175(2) 0.9662(4) 0.0901(2) 0.0460(11) Uani 1 1 d . . . 

H11A H 0.1014 0.9720 0.0499 0.055 Uiso 1 1 calc R . . 

H11B H 0.1482 1.0346 0.0961 0.055 Uiso 1 1 calc R . . 

C12 C 0.0632(2) 0.9814(4) 0.1317(2) 0.0412(10) Uani 1 1 d . . . 

H12A H 0.0798 0.9859 0.1717 0.049 Uiso 1 1 calc R . . 

H12B H 0.0409 1.0604 0.1233 0.049 Uiso 1 1 calc R . . 

C13 C 0.1520(2) 0.7950(4) 0.2046(2) 0.0439(11) Uani 1 1 d . . . 

H13A H 0.1829 0.7576 0.2318 0.053 Uiso 1 1 calc R . . 

H13B H 0.1332 0.8685 0.2241 0.053 Uiso 1 1 calc R . . 

C14 C 0.1874(2) 0.8394(5) 0.1512(2) 0.0471(11) Uani 1 1 d . . . 

H14A H 0.2049 0.9233 0.1592 0.056 Uiso 1 1 calc R . . 

H14B H 0.2236 0.7826 0.1444 0.056 Uiso 1 1 calc R . . 

C15 C 0.07760(19) 0.4584(4) 0.07685(18) 0.0383(10) Uani 1 1 d . . . 

H15A H 0.0984 0.3788 0.0873 0.046 Uiso 1 1 calc R . . 

H15B H 0.0708 0.4581 0.0345 0.046 Uiso 1 1 calc R . . 

C16 C 0.01456(18) 0.4640(4) 0.10622(16) 0.0314(9) Uani 1 1 d . . . 

C17 C -0.0819(2) 0.3364(4) 0.11449(17) 0.0373(10) Uani 1 1 d . . . 

C18 C -0.1047(2) 0.2179(5) 0.1018(2) 0.0528(13) Uani 1 1 d . . . 

H18A H -0.0783 0.1598 0.0824 0.063 Uiso 1 1 calc R . . 

C19 C -0.1644(3) 0.1845(6) 0.1168(2) 0.0686(17) Uani 1 1 d . . . 

H19A H -0.1796 0.1030 0.1087 0.082 Uiso 1 1 calc R . . 

C20 C -0.2022(3) 0.2700(7) 0.1438(2) 0.0749(19) Uani 1 1 d . . . 

H20A H -0.2440 0.2476 0.1546 0.090 Uiso 1 1 calc R . . 

C21 C -0.1804(2) 0.3873(6) 0.1555(2) 0.0621(15) Uani 1 1 d . . . 

H21A H -0.2076 0.4460 0.1736 0.074 Uiso 1 1 calc R . . 

C22 C -0.1199(2) 0.4211(5) 0.14137(18) 0.0458(11) Uani 1 1 d . . . 

H22A H -0.1046 0.5022 0.1502 0.055 Uiso 1 1 calc R . . 

C23 C -0.1537(5) 0.6928(12) 0.0663(5) 0.157(5) Uani 1 1 d . . . 

  

loop_ 

 _atom_site_aniso_label 

 _atom_site_aniso_U_11 

 _atom_site_aniso_U_22 

 _atom_site_aniso_U_33 

 _atom_site_aniso_U_23 

 _atom_site_aniso_U_13 

 _atom_site_aniso_U_12 

Cu1 0.0336(3) 0.0240(3) 0.0290(3) 0.0025(2) -0.00016(19) 0.0043(2) 

Cl1 0.0492(6) 0.0355(6) 0.0510(7) 0.0029(5) 0.0059(5) -0.0076(5) 

O1 0.0539(18) 0.0361(17) 0.0364(16) -0.0046(14) -0.0138(14) 0.0077(14) 

O2 0.0424(16) 0.0291(16) 0.0428(16) -0.0098(14) 0.0051(13) 0.0006(13) 

O3 0.0441(16) 0.0329(16) 0.0324(15) -0.0036(13) -0.0022(12) 0.0125(14) 

O4 0.061(3) 0.076(3) 0.230(7) -0.041(4) 0.047(3) -0.001(2) 

O5 0.267(7) 0.086(4) 0.076(3) 0.043(3) -0.071(4) -0.096(4) 

O6 0.072(2) 0.062(3) 0.088(3) 0.013(2) 0.026(2) -0.013(2) 

O7 0.097(3) 0.044(2) 0.083(3) -0.013(2) -0.023(2) -0.001(2) 

O8 0.100(5) 0.376(16) 0.330(15) 0.126(12) -0.033(7) 0.015(7) 

N1 0.0406(19) 0.034(2) 0.047(2) 0.0092(18) 0.0041(16) -0.0046(16) 

N2 0.0330(17) 0.0302(19) 0.0386(18) -0.0001(16) 0.0023(14) 0.0070(15) 

N3 0.0404(18) 0.0296(19) 0.0295(17) -0.0016(15) -0.0036(14) 0.0050(15) 

N4 0.0383(18) 0.0261(18) 0.0326(18) 0.0030(15) -0.0035(14) -0.0004(15) 

N5 0.0432(19) 0.0260(19) 0.0336(18) -0.0057(15) -0.0006(15) 0.0038(16) 

C1 0.054(3) 0.039(3) 0.036(2) -0.002(2) -0.0095(19) 0.016(2) 

C2 0.040(2) 0.029(2) 0.031(2) 0.0003(18) -0.0003(17) -0.0010(18) 

C3 0.043(2) 0.037(2) 0.035(2) -0.008(2) 0.0013(17) 0.007(2) 

C4 0.047(2) 0.035(2) 0.033(2) -0.003(2) 0.0003(18) 0.000(2) 

C5 0.048(2) 0.038(3) 0.028(2) 0.001(2) -0.0031(18) -0.001(2) 

C6 0.048(2) 0.030(2) 0.037(2) 0.0069(19) -0.0087(19) 0.003(2) 

C7 0.040(2) 0.031(2) 0.053(3) 0.005(2) -0.009(2) 0.0087(19) 

C8 0.049(3) 0.049(3) 0.061(3) 0.012(3) 0.014(2) -0.007(2) 

C9 0.044(3) 0.058(3) 0.068(3) 0.008(3) 0.020(2) 0.005(2) 

C10 0.046(2) 0.047(3) 0.046(3) 0.002(2) 0.013(2) 0.013(2) 

C11 0.056(3) 0.028(2) 0.054(3) 0.013(2) 0.002(2) -0.003(2) 

C12 0.055(3) 0.022(2) 0.046(2) 0.005(2) -0.001(2) 0.001(2) 

C13 0.043(2) 0.036(3) 0.053(3) 0.001(2) -0.015(2) -0.002(2) 

C14 0.039(2) 0.039(3) 0.064(3) 0.003(2) -0.006(2) -0.008(2) 

C15 0.045(2) 0.032(2) 0.039(2) -0.0045(19) 0.0012(19) 0.0048(19) 

C16 0.041(2) 0.029(2) 0.025(2) 0.0028(18) -0.0052(16) 0.0022(18) 

C17 0.051(3) 0.036(2) 0.025(2) -0.0041(19) -0.0015(18) -0.006(2) 

C18 0.068(3) 0.047(3) 0.043(3) -0.008(2) 0.004(2) -0.015(3) 

C19 0.083(4) 0.074(4) 0.049(3) -0.010(3) 0.007(3) -0.039(3) 

C20 0.066(3) 0.110(6) 0.048(3) -0.020(3) 0.010(3) -0.044(4) 

C21 0.053(3) 0.089(4) 0.045(3) -0.018(3) 0.006(2) -0.009(3) 

C22 0.048(3) 0.054(3) 0.035(2) -0.005(2) -0.001(2) -0.004(2) 

C23 0.141(8) 0.214(13) 0.115(8) 0.077(8) 0.002(6) -0.033(8) 

  

_geom_special_details 

; 

 All esds (except the esd in the dihedral angle between two l.s. planes) 

 are estimated using the full covariance matrix.  The cell esds are taken 

 into account individually in the estimation of esds in distances, angles 

 and torsion angles; correlations between esds in cell parameters are only 

 used when they are defined by crystal symmetry.  An approximate (isotropic) 

 treatment of cell esds is used for estimating esds involving l.s. planes. 

; 

  

loop_ 

 _geom_bond_atom_site_label_1 

 _geom_bond_atom_site_label_2 

 _geom_bond_distance 

 _geom_bond_site_symmetry_2 

 _geom_bond_publ_flag 

Cu1 O3 1.950(3) . ? 

Cu1 N4 2.013(3) . ? 

Cu1 N3 2.041(3) . ? 

Cu1 N2 2.050(3) . ? 

Cu1 N1 2.205(3) . ? 

Cu1 O2 2.367(3) . ? 

Cl1 O4 1.380(4) . ? 

Cl1 O5 1.396(5) . ? 

Cl1 O6 1.403(4) . ? 

Cl1 O7 1.405(4) . ? 

O1 C2 1.229(5) . ? 

O2 C16 1.226(5) . ? 

O3 C2 1.255(5) . ? 

O8 C23 1.417(13) . ? 

N1 C14 1.468(6) . ? 

N1 C11 1.468(5) . ? 

N1 C8 1.471(6) . ? 

N2 C15 1.475(5) . ? 

N2 C7 1.480(5) . ? 

N2 C10 1.496(5) . ? 

N3 C1 1.478(5) . ? 

N3 C3 1.481(5) . ? 

N3 C12 1.480(5) . ? 

N4 C5 1.485(5) . ? 

N4 C13 1.485(5) . ? 

N4 C6 1.495(5) . ? 

N5 C16 1.334(5) . ? 

N5 C17 1.400(5) . ? 

C1 C2 1.516(6) . ? 

C3 C4 1.509(6) . ? 

C4 C5 1.513(6) . ? 

C6 C7 1.496(6) . ? 

C8 C9 1.530(7) . ? 

C9 C10 1.505(7) . ? 

C11 C12 1.504(6) . ? 

C13 C14 1.521(6) . ? 

C15 C16 1.496(5) . ? 

C17 C22 1.362(6) . ? 

C17 C18 1.391(6) . ? 

C18 C19 1.355(7) . ? 

C19 C20 1.367(9) . ? 

C20 C21 1.367(8) . ? 

C21 C22 1.369(6) . ? 

  

loop_ 

 _geom_angle_atom_site_label_1 

 _geom_angle_atom_site_label_2 

 _geom_angle_atom_site_label_3 

 _geom_angle 

 _geom_angle_site_symmetry_1 

 _geom_angle_site_symmetry_3 

 _geom_angle_publ_flag 

O3 Cu1 N4 175.88(13) . . ? 

O3 Cu1 N3 86.40(12) . . ? 

N4 Cu1 N3 94.75(13) . . ? 

O3 Cu1 N2 90.42(12) . . ? 

N4 Cu1 N2 88.54(13) . . ? 

N3 Cu1 N2 176.47(13) . . ? 

O3 Cu1 N1 97.98(13) . . ? 

N4 Cu1 N1 86.08(13) . . ? 

N3 Cu1 N1 85.03(14) . . ? 

N2 Cu1 N1 93.91(13) . . ? 

O3 Cu1 O2 88.12(11) . . ? 

N4 Cu1 O2 87.76(12) . . ? 

N3 Cu1 O2 103.36(12) . . ? 

N2 Cu1 O2 78.03(12) . . ? 

N1 Cu1 O2 169.98(12) . . ? 

O4 Cl1 O5 109.4(4) . . ? 

O4 Cl1 O6 107.0(3) . . ? 

O5 Cl1 O6 108.0(3) . . ? 

O4 Cl1 O7 111.0(3) . . ? 

O5 Cl1 O7 108.7(3) . . ? 

O6 Cl1 O7 112.7(3) . . ? 

C16 O2 Cu1 106.7(2) . . ? 

C2 O3 Cu1 114.9(3) . . ? 

C14 N1 C11 113.5(4) . . ? 

C14 N1 C8 112.0(4) . . ? 

C11 N1 C8 109.5(4) . . ? 

C14 N1 Cu1 105.5(3) . . ? 

C11 N1 Cu1 102.2(2) . . ? 

C8 N1 Cu1 113.8(3) . . ? 

C15 N2 C7 111.9(3) . . ? 

C15 N2 C10 106.2(3) . . ? 

C7 N2 C10 112.1(3) . . ? 

C15 N2 Cu1 109.8(2) . . ? 

C7 N2 Cu1 104.9(2) . . ? 

C10 N2 Cu1 112.0(3) . . ? 

C1 N3 C3 110.2(3) . . ? 

C1 N3 C12 110.0(3) . . ? 

C3 N3 C12 111.9(3) . . ? 

C1 N3 Cu1 105.2(2) . . ? 

C3 N3 Cu1 111.4(3) . . ? 

C12 N3 Cu1 107.9(2) . . ? 

C5 N4 C13 110.1(3) . . ? 

C5 N4 C6 107.2(3) . . ? 

C13 N4 C6 112.4(3) . . ? 

C5 N4 Cu1 112.5(2) . . ? 

C13 N4 Cu1 110.3(3) . . ? 

C6 N4 Cu1 104.2(2) . . ? 

C16 N5 C17 128.6(4) . . ? 

N3 C1 C2 114.7(3) . . ? 

O1 C2 O3 124.9(4) . . ? 

O1 C2 C1 117.3(4) . . ? 

O3 C2 C1 117.8(3) . . ? 

N3 C3 C4 116.0(3) . . ? 

C3 C4 C5 115.0(3) . . ? 

N4 C5 C4 116.2(3) . . ? 

N4 C6 C7 110.5(3) . . ? 

N2 C7 C6 111.7(3) . . ? 

N1 C8 C9 114.6(4) . . ? 

C10 C9 C8 117.1(4) . . ? 

N2 C10 C9 117.2(4) . . ? 

N1 C11 C12 111.5(3) . . ? 

N3 C12 C11 111.1(4) . . ? 

N4 C13 C14 115.4(4) . . ? 

N1 C14 C13 115.2(3) . . ? 

N2 C15 C16 114.6(3) . . ? 

O2 C16 N5 125.3(4) . . ? 

O2 C16 C15 122.3(4) . . ? 

N5 C16 C15 112.4(4) . . ? 

C22 C17 C18 120.1(4) . . ? 

C22 C17 N5 123.8(4) . . ? 

C18 C17 N5 116.1(4) . . ? 

C19 C18 C17 120.7(5) . . ? 

C18 C19 C20 118.9(5) . . ? 

C19 C20 C21 120.7(5) . . ? 

C20 C21 C22 120.8(5) . . ? 

C17 C22 C21 118.8(5) . . ? 

  

_diffrn_measured_fraction_theta_max    0.999 

_diffrn_reflns_theta_full              25.00 

_diffrn_measured_fraction_theta_full   0.999 

_refine_diff_density_max    1.038 

_refine_diff_density_min   -0.461 

_refine_diff_density_rms    0.074 
